# Supplementary material for: The Feasibility and Impact of Practising Online Forest Bathing to Improve Anxiety, Rumination, Social Connection and Long-COVID Symptoms: A Pilot Study
Source: MDPI journal article supplement (doi:10.3390/ijerph192214905), 2022-11-12
Supplement: s1 [file s1]

## Long Covid symptoms

To what extent are you currently experiencing the following long-Covid symptoms?

extreme tiredness (fatigue)

Not at all    1    2    3    4    5    6    7    Very much so

shortness of breath

Not at all    1    2    3    4    5    6    7    Very much so

chest pain or tightness

Not at all    1    2    3    4    5    6    7    Very much so

problems with memory and concentration ("brain fog")

Not at all    1    2    3    4    5    6    7    Very much so

difficulty sleeping (insomnia)

Not at all    1    2    3    4    5    6    7    Very much so

heart palpitations

Not at all    1    2    3    4    5    6    7    Very much so

dizziness

Not at all    1    2    3    4    5    6    7    Very much so

pins and needles

Not at all    1    2    3    4    5    6    7    Very much so

joint pain

Not at all    1    2    3    4    5    6    7    Very much so

depression and anxiety

Not at all    1    2    3    4    5    6    7    Very much so

tinnitus, earaches

Not at all    1    2    3    4    5    6    7    Very much so

feeling sick, diarrhoea, stomach aches, loss of appetite

Not at all    1    2    3    4    5    6    7    Very much so

a high temperature, cough, headaches, sore throat

Not at all    1    2    3    4    5    6    7    Very much so

changes to sense of smell or taste

Not at all    1    2    3    4    5    6    7    Very much so

rashes

Not at all    1    2    3    4    5    6    7    Very much so
